# Supplementary material for: Developing and testing community-based tuberculosis (TB) screening intervention to increase TB referral, case detection and knowledge among sexual minority people in urban Bangladesh: a mixed-method study protocol
Source: PubMed Central journal article supplement — BMJ Open. 2020 Sep 22;10(9):e037371. doi: 10.1136/bmjopen-2020-037371 (PMC7509970; doi:10.1136/bmjopen-2020-037371), 2020-09-22
Supplement: bmjopen-2020-037371supp001.pdf [file bmjopen-2020-037371supp001.pdf]

**Supplementary table 1: GRIPP2 long form for the study entitled “Developing and testing community-based tuberculosis (TB) screening intervention to increase TB referral, case detection and knowledge among sexual minority people in urban Bangladesh: A mixed-methods study protocol”**

| Section and topic                     | Item                                                                                                  | Reported on page No                                                                                                     |
|---------------------------------------|-------------------------------------------------------------------------------------------------------|-------------------------------------------------------------------------------------------------------------------------|
| <b>Section 1: Abstract of paper</b>   |                                                                                                       |                                                                                                                         |
| 1a: Aim                               | Report the aim of the study                                                                           | Page 5 (line No: 18-23)                                                                                                 |
| 1b: Methods                           | Describe the methods used by which patients and the public were involved                              | Page 5 (line No: 28-38)                                                                                                 |
| 1c: Results                           | Report the impacts and outcomes of PPI in the study                                                   | Not applicable                                                                                                          |
| 1d: Conclusions                       | Summarise the main conclusions of the study                                                           | Not applicable                                                                                                          |
| 1e: Keywords                          | Include PPI, “patient and public involvement,” or alternative terms as keywords                       | Not applicable                                                                                                          |
| <b>Section 2: Background to paper</b> |                                                                                                       |                                                                                                                         |
| 2a: Definition                        | Report the definition of PPI used in the study and how it links to comparable studies                 | Page 7 (line No: 48-55),<br>Page 8 (line No: 3-49)                                                                      |
| 2b: Theoretical underpinnings         | Report the theoretical rationale and any theoretical influences relating to PPI in the study          | Page 9 (line No: 15-36)                                                                                                 |
| 2c: Concepts and theory development   | Report any conceptual models or influences used in the study                                          | Operational research framework, Page 10 (line No: 29-35)                                                                |
| <b>Section 3: Aims of paper</b>       |                                                                                                       |                                                                                                                         |
| 3: Aim                                | Report the aim of the study                                                                           | Page 9 (line No: 42-51)                                                                                                 |
| <b>Section 4: Methods of paper</b>    |                                                                                                       |                                                                                                                         |
| 4a: Design                            | Provide a clear description of methods by which patients and the public were involved                 | Page 17 (line No: 37-46)<br>Page 18 (line No: 54-56)<br>Page 19 (line No: 3-14, 35-39, 41-56)<br>Page 20 (line No: 3-7) |
| 4b: People involved                   | Provide a description of patients, carers, and the public involved with the PPI activity in the study | Page 12 (line No: 38-45)<br>Page 13 (line No: 3-53)<br>Page 14 (line No: 3-20)                                          |
| 4c: Stages of involvement             | Report on how PPI is used at different stages of the study                                            | Page 22 (line No: 10-28)                                                                                                |

|                                                        |                                                                                                                                                                                               |                                                    |
|--------------------------------------------------------|-----------------------------------------------------------------------------------------------------------------------------------------------------------------------------------------------|----------------------------------------------------|
| 4d: Level or nature of involvement                     | Report the level or nature of PPI used at various stages of the study                                                                                                                         | Not applicable                                     |
| <b>Section 5: Capture or measurement of PPI impact</b> |                                                                                                                                                                                               |                                                    |
| 5a: Qualitative evidence of impact                     | If applicable, report the methods used to qualitatively explore the impact of PPI in the study                                                                                                | Not applicable                                     |
| 5b: Quantitative evidence of impact                    | If applicable, report the methods used to quantitatively measure or assess the impact of PPI                                                                                                  | Page 20 (line No: 27-56)<br>Page 21 (line No: 3-8) |
| 5c: Robustness of measure                              | If applicable, report the rigour of the method used to capture or measure the impact of PPI                                                                                                   | Page 10 (45-55)<br>Page 11 (3-40)                  |
| <b>Section 7: Study results</b>                        |                                                                                                                                                                                               |                                                    |
| 6: Economic assessment                                 | If applicable, report the method used for an economic assessment of PPI                                                                                                                       | Not applicable                                     |
| 7a: Outcomes of PPI                                    | Report the results of PPI in the study, including both positive and negative outcomes                                                                                                         | Not applicable                                     |
| 7b: Impacts of PPI                                     | Report the positive and negative impacts that PPI has had on the research, the individuals involved (including patients and researchers), and wider impacts                                   | Not applicable                                     |
| 7c: Context of PPI                                     | Report the influence of any contextual factors that enabled or hindered the process or impact of PPI                                                                                          | Not applicable                                     |
| 7d: Process of PPI                                     | Report the influence of any process factors, that enabled or hindered the impact of PPI                                                                                                       | Not applicable                                     |
| 7ei: Theory development                                | Report any conceptual or theoretical development in PPI that have emerged                                                                                                                     | Not applicable                                     |
| 7eii: Theory development                               | Report evaluation of theoretical models, if any                                                                                                                                               | Not applicable                                     |
| 7f: Measurement                                        | If applicable, report all aspects of instrument development and testing (eg, validity, reliability, feasibility, acceptability, responsiveness, interpretability, appropriateness, precision) | Page 21 (line No: 16-36)                           |
| 7g: Economic assessment                                | Report any information on the costs or benefit of PPI                                                                                                                                         | Not applicable                                     |
| <b>Section 8: Discussion and conclusions</b>           |                                                                                                                                                                                               |                                                    |
| 8a: Outcomes                                           | Comment on how PPI influenced the study overall.                                                                                                                                              | Not applicable                                     |

|                                           |                                                                                                                                           |                |
|-------------------------------------------|-------------------------------------------------------------------------------------------------------------------------------------------|----------------|
|                                           | Describe positive and negative effects                                                                                                    |                |
| 8b: Impacts                               | Comment on the different impacts of PPI identified in this study and how they contribute to new knowledge                                 | Not applicable |
| 8c: Definition                            | Comment on the definition of PPI used (reported in the Background section) and whether or not you would suggest any changes               | Not applicable |
| 8d: Theoretical underpinnings             | Comment on any way your study adds to the theoretical development of PPI                                                                  | Not applicable |
| 8e: Context                               | Comment on how context factors influenced PPI in the study                                                                                | Not applicable |
| 8f: Process                               | Comment on how process factors influenced PPI in the study                                                                                | Not applicable |
| 8g: Measurement and capture of PPI impact | If applicable, comment on how well PPI impact was evaluated or measured in the study                                                      | Not applicable |
| 8h: Economic assessment                   | If applicable, discuss any aspects of the economic cost or benefit of PPI, particularly any suggestions for future economic modelling.    | Not applicable |
| 8i: Reflections/critical perspective      | Comment critically on the study, reflecting on the things that went well and those that did not, so that others can learn from this study | Not applicable |
